# Supplementary material
Source: publisher figshare collection journal article supplement (https://karger.figshare.com/articles/dataset/_/3859077)

# *Znt-1*

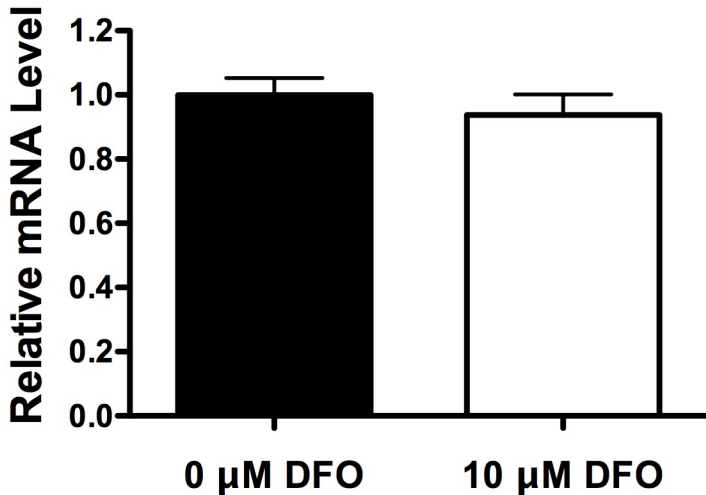

Supplement: Supplementary file 1 [file 1]

**18DIV**

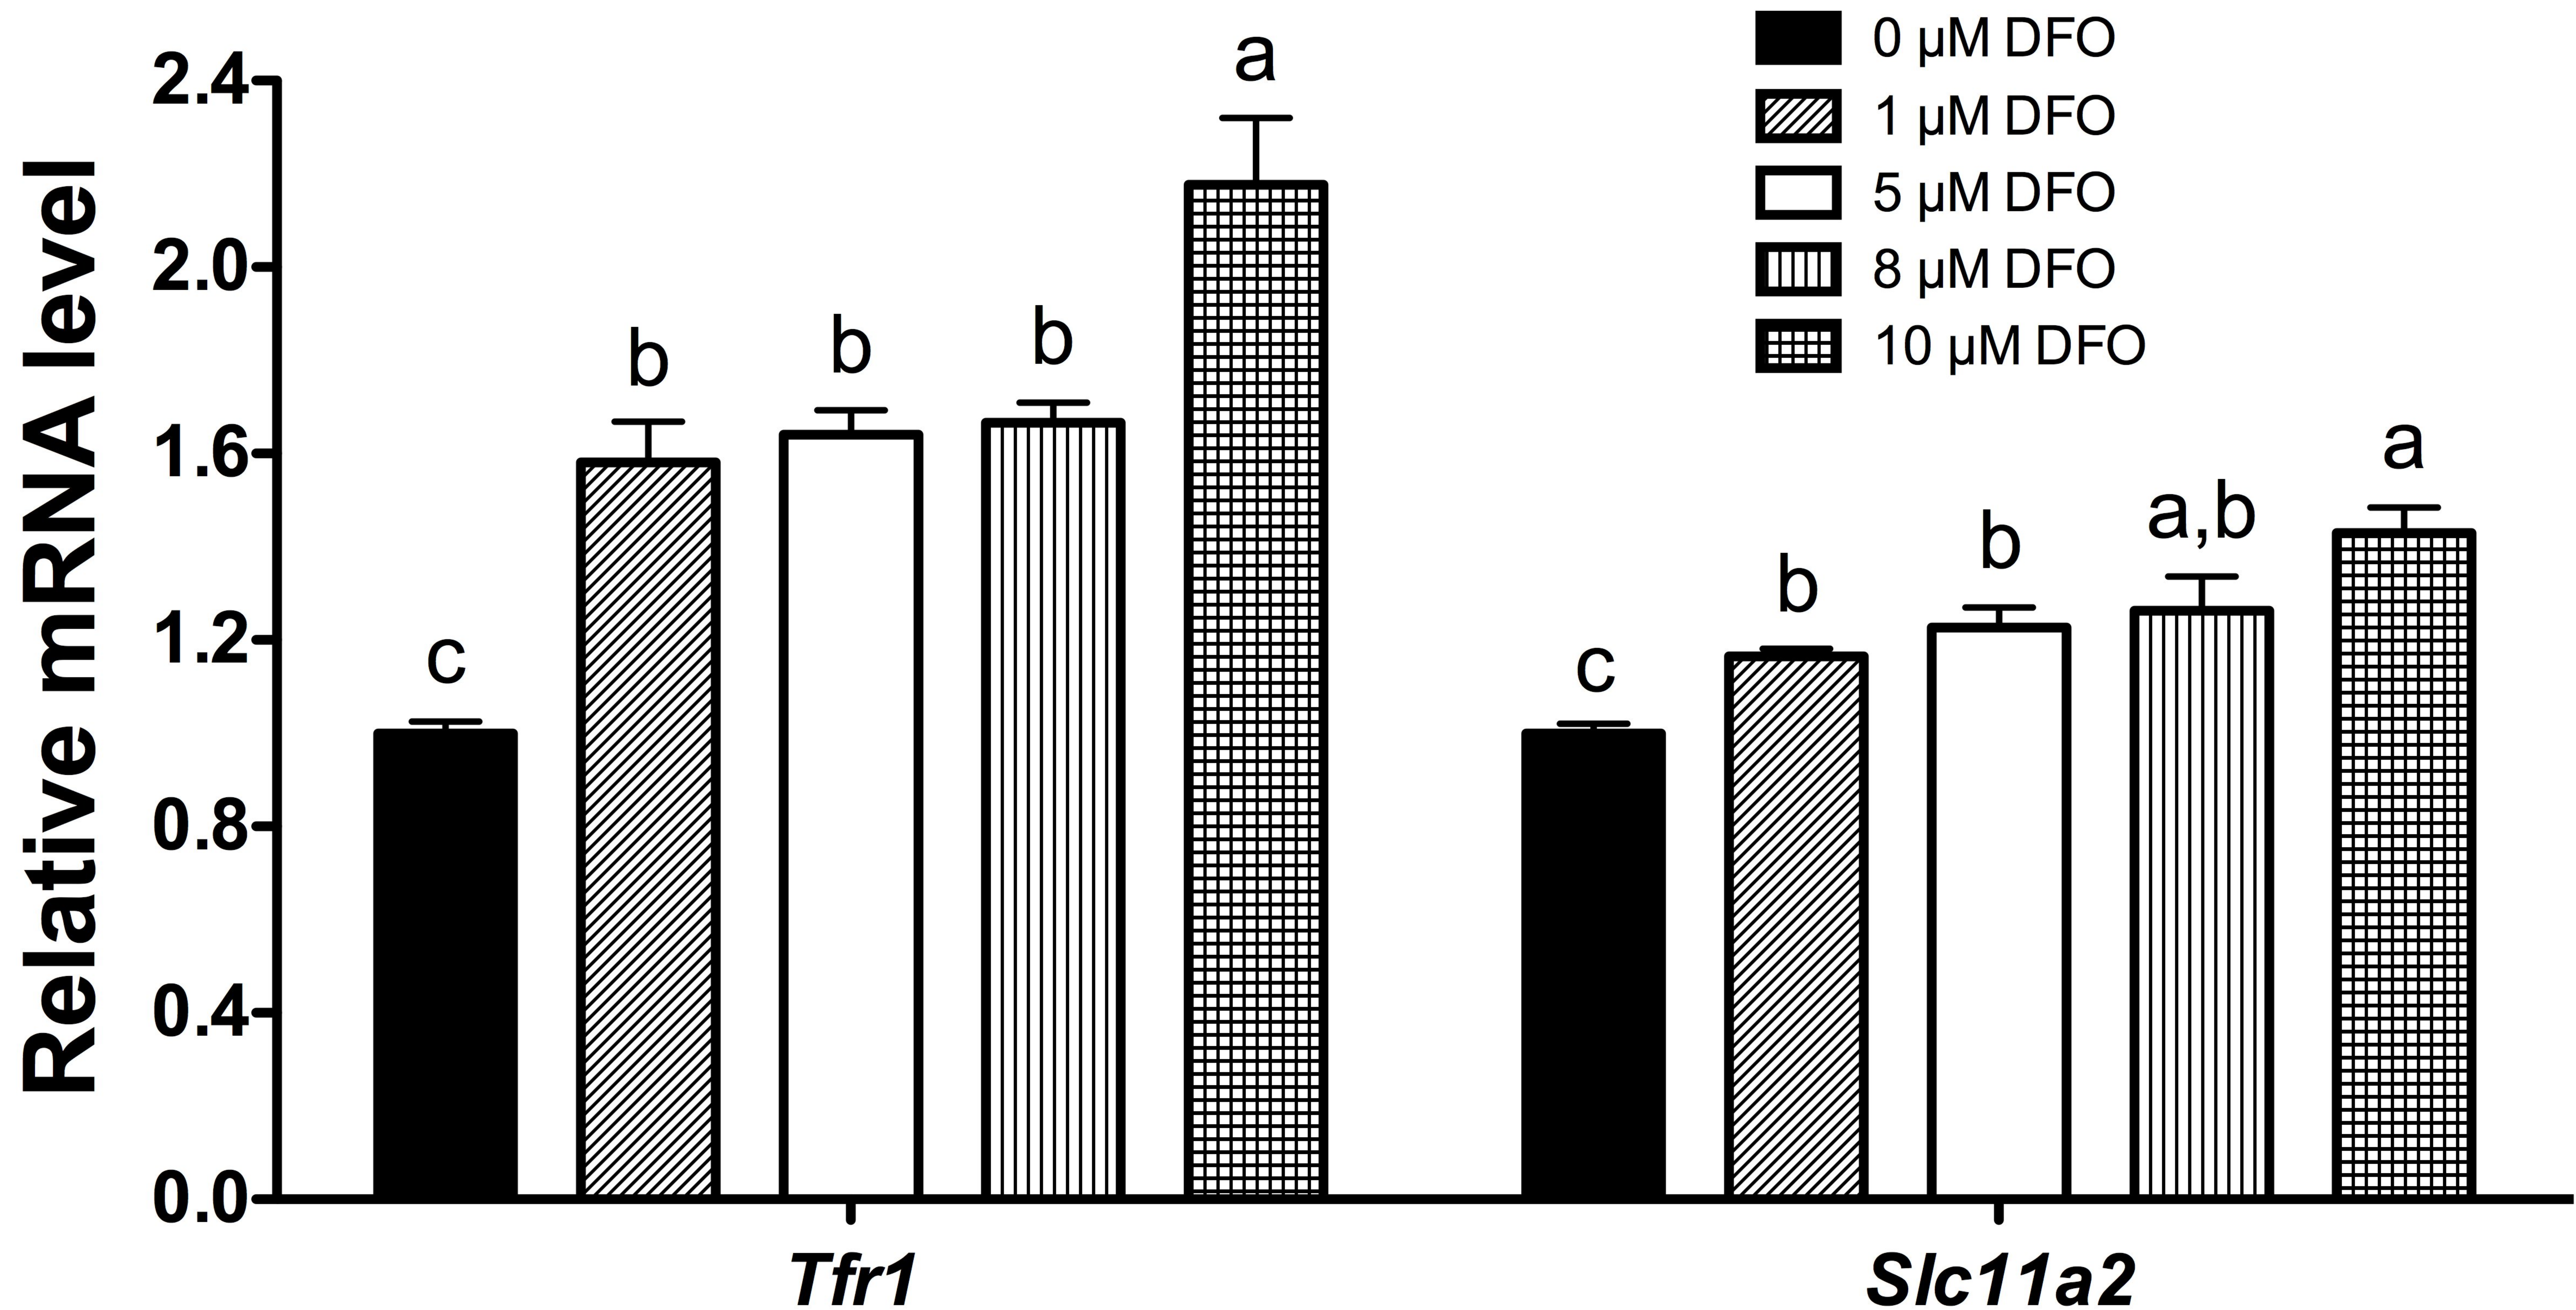

Supplement: Supplementary file 2 [file 1]
